# Supplementary material
Source: PubMed Central journal article supplement (PMC9569337)
Supplement: 41598_2022_20176_MOESM1_ESM.pdf [file 41598_2022_20176_MOESM1_ESM.pdf]

1 **Identifying pre-existing conditions and multimorbidity patterns associated**  
2 **with in-hospital mortality in patients with COVID-19**

3 Magda Bucholc, PhD<sup>1,2</sup>, Declan Bradley, PhD<sup>2,3</sup>, Damien Bennett, PhD<sup>2</sup>, Lynsey Patterson,  
4 PhD<sup>2</sup>, Rachel Spiers, MPH<sup>2</sup>, David Gibson, PhD<sup>4</sup>, Hugo Van Woerden PhD<sup>2,5,6</sup>, Anthony J  
5 Bjourson, PhD<sup>4</sup>

6

7 <sup>1</sup> Intelligent Systems Research Centre, School of Computing, Engineering & Intelligent  
8 Systems, Ulster University, Londonderry, BT48 7JL, United Kingdom

9 <sup>2</sup> Public Health Agency, Belfast, BT2 8BS, United Kingdom

10 <sup>3</sup> Centre for Public Health, Queen's University Belfast, Belfast, BT12 6BA, United Kingdom

11 <sup>4</sup> Northern Ireland Centre for Stratified Medicine, Biomedical Sciences Research Institute,  
12 Ulster University, Londonderry, BT47 6SB, United Kingdom

13 <sup>5</sup> Institute of Nursing and Health Research, Ulster University, Coleraine, BT52 1SA 3, United  
14 Kingdom

15 <sup>6</sup> Division of Rural Health and Wellbeing, University of the Highlands and Islands, Inverness,  
16 IV2 3JH, United Kingdom

17

18 Corresponding author: Magda Bucholc, PhD; Intelligent Systems Research Centre, School of  
19 Computing, Engineering & Intelligent Systems, Ulster University, Londonderry, BT48 7JL,  
20 United Kingdom. E-mail: [m.bucholc@ulster.ac.uk](mailto:m.bucholc@ulster.ac.uk)

21

22

## 23 **Abstract**

24 We investigated the association between a wide range of comorbidities and COVID-19 in-  
25 hospital mortality and assessed the influence of multimorbidity on the risk of COVID-19-related  
26 death using a large, regional cohort of 6036 hospitalized patients. This retrospective cohort  
27 study was conducted using Patient Administration System Admissions and Discharges data.  
28 The International Classification of Diseases 10th edition (ICD-10) diagnosis codes were used  
29 to identify common comorbidities and the outcome measure. Individuals with lymphoma (odds  
30 ratio [OR], 2.78;95%CI,1.64-4.74), metastatic cancer (OR, 2.17; 95%CI,1.25-3.77), solid  
31 tumour without metastasis (OR, 1.67; 95%CI,1.16-2.41), liver disease (OR: 2.50, 95%CI,1.53-  
32 4.07), congestive heart failure (OR, 1.69; 95%CI,1.32-2.15), chronic obstructive pulmonary  
33 disease (OR, 1.43; 95%CI,1.18-1.72), obesity (OR, 5.28; 95%CI,2.92-9.52), renal disease  
34 (OR, 1.81; 95%CI,1.51-2.19), and dementia (OR, 1.44; 95%CI,1.17-1.76) were at increased  
35 risk of COVID-19 mortality. Asthma was associated with a lower risk of death compared to  
36 non-asthma controls (OR, 0.60; 95%CI,0.42-0.86). Individuals with two (OR, 1.79; 95%CI,  
37 1.47-2.20;  $P < 0.001$ ), and three or more comorbidities (OR, 1.80; 95%CI, 1.43-2.27;  $P <$   
38  $0.001$ ) were at increasingly higher risk of death when compared to those with no underlying  
39 conditions. Furthermore, multimorbidity patterns were analysed by identifying clusters of  
40 conditions in hospitalised COVID-19 patients using k-mode clustering, an unsupervised  
41 machine learning technique. Six patient clusters were identified, with recognisable co-  
42 occurrences of COVID-19 with different combinations of diseases, namely, cardiovascular  
43 (100%) and renal (15.6%) diseases in patient Cluster 1; mental and neurological disorders  
44 (100%) with metabolic and endocrine diseases (19.3%) in patient Cluster 2; respiratory  
45 (100%) and cardiovascular (15.0%) diseases in patient Cluster 3, cancer (5.9%) with  
46 genitourinary (9.0%) as well as metabolic and endocrine diseases (9.6%) in patient Cluster 4;  
47 metabolic and endocrine diseases (100%) and cardiovascular diseases (69.1%) in patient  
48 Cluster 5; mental and neurological disorders (100%) with cardiovascular diseases (100%) in  
49 patient Cluster 6. The highest mortality of 29.4% was reported in Cluster 6.

## 50 **Introduction**

51 The coronavirus disease 2019, caused by severe acute respiratory syndrome coronavirus-2  
52 (SARS-CoV-2), continues to pose a major threat to public health worldwide. The clinical  
53 spectrum of COVID-19 ranges from an asymptomatic state or mild respiratory symptoms to  
54 severe viral pneumonia and acute respiratory distress syndrome<sup>1,2</sup>. Although severe illness  
55 from COVID-19 can occur in healthy individuals of any age, the risk of severe symptoms with  
56 rapid disease progression and death is significantly higher in older adults, with people over  
57 the age of 80 having 20-fold increased risk of COVID-19-related death than adults aged 50–  
58 59 years<sup>3</sup>. The severity of, and mortality due to, COVID-19 are higher in males than females<sup>4</sup>.  
59 The OpenSAFELY analysis of 17,278,392 primary care records, including 10,926 COVID-19  
60 deaths, showed that older people, males, and those living in deprived areas were at  
61 significantly higher risk of COVID-19-related death<sup>3</sup>. Furthermore, various pre-existing  
62 conditions, such as, cardiovascular disease<sup>4-8</sup>, diabetes<sup>4,5,7</sup>, hypertension<sup>4,7,8</sup>, respiratory  
63 diseases<sup>4,7,8</sup>, cancer<sup>4,9</sup>, chronic kidney disease<sup>5,10</sup>, obesity<sup>5,11,12</sup> have been associated with  
64 increased risk of COVID-19 occurrence, the development of severe health conditions, and  
65 higher risk of death. In fact, reports showed that over 90% of individuals that died as a direct  
66 consequence of SARS-CoV-2 infection had at least one pre-existing condition<sup>13</sup>. Chen et al.<sup>14</sup>  
67 reported that patients with severe or critical COVID-19 who died were on average 17 years  
68 older, more likely to be male, and more likely to have a comorbidity such as hypertension,  
69 diabetes, cardiovascular disease, or chronic lung disease. A study by the Chinese Center for  
70 Disease Control and Prevention (44,672 confirmed cases, 1,023 deaths) showed that several  
71 pre-existing medical conditions including cardiovascular disease, hypertension, diabetes,  
72 respiratory disease, and cancer, substantially increased the risk of COVID-19 adverse  
73 outcomes<sup>15</sup>. In the UK, a cross-sectional survey of 16,749 individuals hospitalized with  
74 COVID-19 demonstrated that patients with chronic cardiac, pulmonary, and kidney disease,  
75 cancer, dementia and obesity were at higher risk of death<sup>16</sup>. People with obesity who

76 contracted SARS-CoV-2, not only required invasive mechanical ventilation more often but  
77 were also 48% more likely to die<sup>17,18</sup>.

78 Given the evidence suggesting that COVID-19 disproportionately impacts the elderly and  
79 people living with long-term conditions, more research into the factors associated with deaths  
80 due to COVID-19 involving different population groups and settings is needed to better inform  
81 the design of strategies to reduce harm to those at highest risk. Furthermore, there is a paucity  
82 of research on the impact of multimorbidity on the risk of a fatal outcome associated with  
83 COVID-19. In this study, we aimed to estimate the impact of multiple long-term conditions on  
84 COVID-19 in-hospital mortality and assess the influence of multimorbidity on the risk of  
85 COVID-19-related death using a large, regional cohort of hospitalized patients.

## 86 **Results**

### 87 *Analytical population*

88 The dataset used in this study was based on the hospital identifying the admission as a  
89 COVID-19 admission and coding the method of admission accordingly. In effect, 8524 records  
90 identified as COVID-19 hospital admissions were initially considered for inclusion. Patients (n  
91 = 1075) were then excluded from the analysis if COVID-19 was not confirmed by laboratory  
92 testing or not diagnosed clinically or epidemiologically as reflected in the ICD-10 coding (note  
93 that the method of admission was not retrospectively amended). In addition, 552 patients with  
94 no ICD-10 codes were excluded. In effect, analyses were restricted to patients with ICD-10  
95 diagnosis code for COVID-19, including primary or secondary diagnosis code of U07.1 and  
96 U07.2, with complete ICD-10 data on pre-existing health conditions. The ICD-10 diagnosis  
97 codes from multiple records of hospital admissions for a specific individual, including transfers  
98 between or within hospitals, were combined and the duplicate ICD-10 codes removed (n =  
99 861). This resulted in a subset of 6036 (70.8%) hospitalized COVID-19 cases included in the  
100 analysis (Fig. 1). Out of 6036 patients, 5955 (98.7%) represented cases when COVID-19 was  
101 confirmed by laboratory testing (ICD-10 diagnosis code U07.1) while 81 (1.3%) corresponded

102 to COVID-19 cases that were diagnosed clinically or epidemiologically since laboratory testing  
103 was inconclusive or not available (ICD-10 diagnosis code U07.2).

104 Demographic and clinical characteristics of COVID-19 patients are shown in Table 1. The  
105 median (interquartile range, IQR) age of the 6036 patients was 72 (57-82) years. Patients that  
106 died were older (80 (73-86) years) than those that survived hospitalization (68 (54-80) years).  
107 Of those admitted to hospital with COVID-19, there was a higher proportion of males (3213,  
108 53.2%) than females (2823, 46.8%), with men having a higher risk of COVID-19–associated  
109 mortality (711, 58%) compared to women (514, 42%) ( $P < 0.001$ ). While 1713 patients (28.4%)  
110 had no previous comorbidities, 2010 patients (33.3%) had one, 1507 patients (25.0%) had  
111 two, and 806 patients (13.3%) had three or more comorbidities, with hypertension (22.7%),  
112 chronic obstructive pulmonary disease (19.8%), and diabetes (15.6%) being the most  
113 common conditions.

#### 114 *Comorbidities and in-hospital mortality in patients with COVID-19*

115 An overview of associations between different comorbidities examined in this study and in-  
116 hospital mortality in patients with COVID-19 are shown in Table 2. Only 15.3% (187/1225) of  
117 patients who died in hospital from COVID-19 had no documented long-term conditions. Out  
118 of patients who were discharged, 31.7% (1526/4811) had no record of pre-existing long-term  
119 conditions. However, it is worth noting that patients with no record of pre-existing long-term  
120 conditions who died were significantly older (median (IQR): 81 (72-86) years) than those who  
121 were discharged (58 (44-72) years) ( $p < 0.05$ ). Age was the factor most strongly associated  
122 with higher risk of COVID-19–associated mortality with a clear large gradient seen with  
123 increasing age (e.g., OR, 3.62; 95%CI, 1.83-7.71;  $P < 0.001$  in patients aged 50-59 years;  
124 OR, 8.98; 95%CI, 4.69-17.24;  $P < 0.001$  in patients aged 60-69 years; and OR, 14.53; 95%CI,  
125 7.62-27.69;  $P < 0.001$  in patients 70-79 years compared with those aged 40 to 49 years). The  
126 largest mortality risk was observed in patients aged  $\geq 80$  years compared with those aged 40-  
127 49 years (OR, 23.77; 95%CI, 12.48-45.27;  $P < 0.001$ ). No significant difference in risk of  
128 COVID-19-related death was found between the age groups 0-40 years and 40-49 years (OR,

129 0.60; 95%CI, 0.20-1.77,  $p = 0.36$ ). The risk of death was significantly higher in men (OR, 1.41;  
130 95%CI, 1.22-1.62;  $P < 0.001$ ). Furthermore, individuals with obesity (OR, 5.28; 95%CI, 2.92-  
131 9.52;  $P < 0.001$ ), lymphoma (OR, 2.78; 95%CI, 1.64-4.74;  $P < 0.001$ ), metastatic cancer (OR,  
132 2.17; 95%CI, 1.25-3.77;  $P = 0.006$ ), solid tumour without metastasis (OR, 1.67; 95%CI, 1.16-  
133 2.41;  $P = 0.006$ ), liver disease (OR: 2.50, 95%CI, 1.53-4.07;  $P < 0.001$ ), congestive heart  
134 failure (OR, 1.69; 95%CI, 1.32-2.15;  $P < 0.001$ ), chronic obstructive pulmonary disease (OR,  
135 1.43; 95%CI, 1.18-1.72;  $P < 0.001$ ), renal disease (OR, 1.81; 95%CI, 1.51-2.19;  $P < 0.001$ ),  
136 dementia (OR, 1.44; 95%CI, 1.17-1.76;  $P < 0.001$ ) were at increased risk of in-hospital  
137 mortality. People with asthma were significantly less likely to die due to COVID-19 (OR, 0.60;  
138 95%CI, 0.42-0.86;  $P = 0.005$ ). No significant associations were observed between cardiac  
139 arrhythmias, diabetes, hypertension, hypothyroidism, rheumatoid arthritis/collagen vascular  
140 diseases, depression, neurological disorders, and risk of death (Table 2).

141 Increasing number of comorbidities was associated with a greater COVID-19 in-hospital  
142 mortality risk. Individuals with one pre-existing health condition had an adjusted OR for in-  
143 hospital death of 1.44 (95%CI, 1.18-1.75;  $P < 0.001$ ), compared to those with no pre-existing  
144 health conditions (Table 3). Furthermore, the risk of death was increasingly higher in patients  
145 with two (OR, 1.79; 95%CI, 1.47-2.20;  $P < 0.001$ ), and three or more comorbidities (OR, 1.80;  
146 95%CI, 1.43-2.27;  $P < 0.001$ ). Analyses stratified by sex showed a similar trend, i.e., both men  
147 and women with multiple pre-existing health conditions had increased odds of death when  
148 compared to those with no pre-existing health conditions (Table 3). However, the interaction  
149 test showed that the effect of the number of pre-existing conditions on the risk of COVID-19-  
150 related death did not differ significantly between males and females.

### 151 *Multimorbidity clusters*

152 Out of 6,036 hospitalised patients, 2313 (38.3%) had  $\geq 2$  conditions. The optimal k-modes  
153 clustering solution yielded 6 patient groups. The number of patients in each group ranged from  
154 648 (Cluster 2) to 2293 (Cluster 3). The identified patient clusters had significant differences  
155 in mortality, ranging from 15.3% (Cluster 4) to 29.4% (Cluster 6). Median (IQR) age ranged

156 from 63 (49-78) (Cluster 4) to 82 (74-86) (Cluster 6). Table 4 describes the prevalence of  
157 diseases in each patient cluster. Within each patient cluster, disease groups with the highest  
158 prevalence were highlighted in bold while other less common conditions with a higher  
159 prevalence than in other clusters were underlined. Cluster 1 was characterised by  
160 cardiovascular (100.0%), genitourinary (15.6%), and respiratory diseases (9.9%). Cluster 2  
161 included a high percentage of patients with mental and neurological disorders (100%),  
162 metabolic and endocrine diseases (19.3%), and genitourinary diseases (9.4%). It was also  
163 Cluster 2 that had the highest percentage of patients with digestive diseases (2.5%). Note that  
164 digestive disease group included only patients with liver disease. Cluster 3 was characterized  
165 by respiratory (100%), cardiovascular (15.0%), and metabolic and endocrine diseases  
166 (12.7%) while Cluster 5 corresponded to the patient group with a high prevalence of metabolic  
167 & endocrine (100%), cardiovascular (69.1%), and genitourinary diseases (15.0%). The highest  
168 percentage of patients with cancer (5.9%) was found in Cluster 5. Finally, Cluster 6, with the  
169 highest mortality, was characterized by cardiovascular diseases (100.0%), and mental and  
170 neurological disorders (100%). Other featured conditions in this group were respiratory  
171 diseases (15.7%). This cluster had also the highest median (IQR) age of 82 (74-86). Several  
172 conditions were present in multiple patient clusters; however, their prevalence significantly  
173 differ.

#### 174 *Sensitivity analysis*

175 The results of two sensitivity analyses, based on identifying COVID-19 related admissions  
176 with ICD-10 code diagnosis: 1) including only primary or secondary diagnosis code of U07.1  
177 (Table 5) and 2) including U07.1 or U07.2 as the primary code (Table 6), were consistent with  
178 those of the primary analysis. The magnitude and significance of associations between  
179 potential risk factors and the outcome measure remained robust under different assumptions.  
180 The difference in results between the primary and sensitivity analyses was observed only for  
181 neurological disorders, i.e., neurological disorders were found to be associated with increased  
182 risk of COVID-19-related deaths in sensitivity analysis in which COVID-19 deaths were

183 defined as COVID-19 related admissions with ICD-10 diagnosis code U07.1 or U07.2 as the  
184 primary code for clinical diagnosis (OR, 1.45; 95%CI, 1.04-2.01; P = 0.03).

185 Compared with people with no underlying conditions, the risk of death was significantly higher  
186 for those with one or more comorbidities (OR, 1.63; 95%CI, 1.36-1.94; P < 0.001) (Table S2  
187 in Supplementary Material). Moreover, the risk of death was increasingly higher in patients  
188 with two and three or more comorbidities (Table S3 and S4 in Supplementary Material). These  
189 results strengthened the credibility of our main findings by highlighting the significant  
190 association between underlying health conditions and in-hospital mortality in individuals with  
191 COVID-19.

192 Since the primary analysis indicated that asthma was associated with a decreased risk of  
193 COVID-19-related death, we also performed a third sensitivity analysis to compare the risk of  
194 death from COVID-19 in people with asthma compared to those with no documented  
195 comorbidities. Our results showed no difference in risk of death from COVID-19 in people with  
196 asthma compared to patients with no record of underlying long-term conditions (OR, 1.22;  
197 95%CI, 0.86-1.75; P = 0.27), suggesting that the presence of other comorbidities may have  
198 an impact on the significance of results of the primary analysis. We intend to investigate the  
199 extents of multimorbidity in patients with asthma as well as the relationship between asthma  
200 medications and different multimorbidity patterns in future work.

## 201 **Discussion**

202 Early recognition of high-risk and critically ill patients has become a priority in improving  
203 treatment and reducing mortality among patients who contracted SARS-CoV-2<sup>2</sup>. In this study,  
204 we examined the impact of multiple long-term conditions on the in-hospital mortality in  
205 individuals with COVID-19 to determine risk factors for COVID-19-related deaths. Our findings  
206 can help improve the effectiveness of management of COVID-19 patients and contribute to  
207 further development of policies for prevention and response to COVID-19 and its critical  
208 outcomes. Using a large, well-documented, regional cohort of hospitalised COVID-19 patients,



209 we found that pre-existing health conditions, including obesity, liver disease, renal disease,  
210 metastatic cancer, solid tumour without metastasis, lymphoma, congestive heart failure,  
211 chronic obstructive pulmonary disease, and dementia are clinical risk factors associated with  
212 COVID-19 mortality, with chronic obstructive pulmonary disease, renal disease, and dementia  
213 being the most prevalent among those that died.

214 Our results are consistent with several studies<sup>4,5,7,19-22</sup>. Chronic obstructive pulmonary disease  
215 (COPD) was found to increase the odds of death by nearly 3-fold in a large meta-analysis of  
216 30 studies that examined the vital status of COVID-19 patients with COPD<sup>19</sup>. Substantial  
217 mortality rates in COVID-19 patients with COPD were also observed by other studies<sup>20,21</sup>. It  
218 has been suggested that the association between COPD and risk of poor outcomes in COVID-  
219 19 might be related to the fact that the innate and acquired antiviral immune responses in  
220 individuals with COPD are impaired, leading to delayed virus clearance<sup>19</sup>. Dementia was  
221 identified as a major risk factor for death in COVID-19 cases<sup>22,23</sup>. Wang et al.<sup>22</sup> showed that  
222 the odds of COVID-19-related death in patients with dementia doubled when compared to  
223 individuals without dementia, with the highest mortality risk in adults with vascular dementia  
224 (OR, 3.17; 95% CI, 2.97–3.37,  $P < 0.001$ ). Some evidence suggested that elevated risk of  
225 neurological complications from COVID-19 in people with dementia might be caused by the  
226 pre-existing brain pathology<sup>24</sup>. For example, the breakdown of the blood-brain barrier, i.e., a  
227 defence mechanism against disease-causing pathogens, in patients with Alzheimer's disease  
228 and vascular dementia, can increase the ability of bacterial, fungal, and viral pathogens to  
229 access the brain more easily and this in turn may have an effect on the severity of COVID-19  
230 and associated fatal outcomes<sup>25,26</sup>. A number of studies investigated the impact of chronic  
231 diseases and health conditions on risk of COVID-19-related death through multivariate  
232 analyses<sup>4,5,7-10,27</sup>; however, some of them were based on a small sample size, included a  
233 limited list of underlying medical conditions or focused on the impact of a specific medical  
234 condition on COVID-19 mortality adjusted for demographic and/or socioeconomic  
235 characteristics<sup>7,9,10</sup>. Moreover, previous evidence on the relationship between multimorbidity

236 and COVID-19-related death was limited<sup>4,5</sup>. A UK prospective observational study of 20,133  
237 patients who were hospitalised with COVID-19 showed that the risk of death was higher for  
238 patients with dementia, chronic pulmonary disease, kidney disease, cardiac disease, liver  
239 disease, malignancy, and obesity<sup>5</sup>. Another study based on 10,926 COVID-19-related deaths  
240 reported similar results: individuals with COVID-19 and underlying kidney disease, liver  
241 disease, cardiovascular disease, chronic respiratory diseases, obesity, and recent history of  
242 haematological malignancy or other cancers had a greater risk of dying<sup>27</sup>. Cancer, possibly  
243 due to its ability to cause immunodeficiency inherently or through medication, was identified  
244 as a major risk factor for COVID-19-related deaths in several studies<sup>4,5,27</sup>. In individuals with  
245 heart failure and kidney disease, both the SARS-CoV-2 infection and the immune response  
246 to the viral infection could destabilize pre-existing conditions, leading to the development of  
247 acute cardiac<sup>28</sup> or kidney<sup>29</sup> injuries and hence, increase the risk of a fatal outcome associated  
248 with COVID-19<sup>30</sup>. People with obesity have been previously characterized by systemic low-  
249 grade inflammation, impaired immune response to infections, and higher susceptibility and  
250 mortality associated with infections<sup>17,31,32</sup>. These factors may all lead to a greater mortality risk  
251 in those who contracted SARS-CoV-2. Several studies emerging from different countries  
252 identified obesity as an independent risk factor for hospitalisation and death due to COVID-  
253 19<sup>11,12,18,31,32</sup>, with a BMI  $\geq 35$  kg/m<sup>2</sup> radically increasing the mortality risk<sup>33</sup>.

254 In our study, asthma diagnosis was present among 7.6% of hospitalized patients with COVID-  
255 19, which is lower than the 9.8% prevalence of asthma in Northern Ireland<sup>34</sup>. At the same time,  
256 we found asthma to be associated with a lower risk of COVID-19-related death in the full  
257 sample, although the results of our sensitivity analysis showed no difference in risk of COVID-  
258 19-related death in patients with asthma compared to individuals with no documented  
259 comorbidities. This finding supports the mixed evidence on the role of asthma in influencing  
260 COVID-19-related outcomes. The OpenSAFELY study identified asthma as a significant risk  
261 factor of death in patients with COVID-19 and indicated that patients on inhaled corticosteroids  
262 have the greatest risk<sup>3</sup>. In vitro studies have suggested that corticosteroids use can result in

263 impaired antiviral innate immune responses<sup>35,36</sup> and delayed virus clearance<sup>37</sup>, and this in turn  
264 can potentially lead to more severe outcomes in individuals who contracted SARS-CoV-2;  
265 however, this hypothesis has to be further tested. Several studies found no statistically  
266 significant difference in mortality risk by asthma status<sup>38,39</sup>. For example, the prospective case-  
267 control study based on the UK Biobank data showed that asthma did not significantly increase  
268 the odds of COVID-19 mortality<sup>38</sup>. More recent work however indicated that people with  
269 asthma were in fact less likely to die due to COVID-19<sup>40</sup>. Interestingly, the risk of severe clinical  
270 outcomes of COVID-19 was lower in people with allergic asthma<sup>41</sup>. Akenroye et al.<sup>42</sup>  
271 suggested that some asthma medications, such as mepolizumab, reslizumab, and  
272 benralizumab, may enhance immune responses to viral infections and potentially decrease  
273 susceptibility to additional lung injury from diseases such as COVID-19. The association  
274 between asthma and COVID-19 mortality could also differ by the degree of asthma severity<sup>3</sup>.  
275 Given that our sensitivity analysis showed no difference in risk of COVID-19-related death in  
276 patients with asthma compared to individuals with no documented comorbidities, but our  
277 primary results indicated a lower risk of COVID-19-related death in patients with asthma  
278 compared to non-asthma controls, further analysis is required to evaluate the impact of  
279 differing patterns and extents of multimorbidity in patients with asthma (e.g. cardiometabolic  
280 multimorbidity) and the role of different asthma medications when examining COVID-19-  
281 related outcomes.

282 We confirmed that COVID-19-related mortality increased with older age. In particular, patients  
283 in age groups  $\geq 50$  years old had higher odds of COVID-19-related death when compared with  
284 those aged 40 to 49 years. Higher COVID-19 mortality among older adults has been known  
285 since early in the pandemic and has been described in detail<sup>3,27,43</sup>. The analysis based on the  
286 US epidemiologic data demonstrated that the overall COVID-19 case-fatality rate among  
287 individuals infected with SARS-CoV-19 was highest in those aged  $\geq 85$  years (range 10%–  
288 27%), followed by those aged 65-84 years (3%–11%), aged 55-64 years (1%–3%), and aged

289 <55 years (<1%)<sup>43</sup>. Greater risk of death due to COVID-19 in older adults is likely related to  
290 their declining immune defences, however other hypotheses have also been suggested<sup>44</sup>.

291 Finally, we demonstrated that multimorbidity is an important clinical characteristic to consider  
292 in the context of the COVID19 pandemic. Our findings showing the higher COVID-19 in-  
293 hospital mortality risk in people with multiple underlying conditions are consistent with other  
294 published data<sup>45</sup>. A cross-sectional, multicenter, observational study of Italian COVID-19  
295 population found that increasing multimorbidity, measured by the Charlson Comorbidity Index,  
296 was strongly associated with COVID-19-related death<sup>46</sup>. Kim et al.<sup>47</sup>, in their study of 2,491  
297 COVID-19 patients, reported that individuals with 3 or more underlying conditions had a 1.8  
298 times higher risk of in-hospital mortality than patients with no underlying conditions.  
299 Multimorbidity was also reported to be a predictor of the risk of COVID-19 infection in a large  
300 UK Biobank cohort of 428,199 participants; however, the authors did not report on the  
301 relationship between the co-existence of multiple underlying conditions and risk of death<sup>48</sup>.

302 We also analysed multimorbidity patterns by identifying clusters of conditions in hospitalised  
303 COVID-19 patients using an unsupervised machine learning technique (k-mode clustering).  
304 Our study revealed recognisable co-occurrences of COVID-19 with different combinations of  
305 diseases, with a potentially causal link or underlying mechanism, including cardiovascular  
306 diseases, respiratory diseases, mental and neurological disorders, metabolic and endocrine  
307 diseases, and renal diseases. For example, Cluster 1 characterized by the group of individuals  
308 with cardiovascular diseases had also a high percentage of cases with COPD. Previous  
309 studies suggested that the systemic inflammatory response associated with COPD may act  
310 as a possible mechanism that links COPD with increased risk for cardiovascular diseases<sup>49</sup>.  
311 Furthermore, it was demonstrated that COPD is associated with increased carotid intimal  
312 medial thickness (CIMT) and that among those with COPD, CIMT is linked to higher  
313 cardiovascular mortality<sup>50</sup>. Evidence also supports the association between renal disease and  
314 cognitive impairment (Cluster 2); however, the mechanisms underlying this association are  
315 not completely elucidated<sup>51</sup>. Although, direct impact of uremic toxins has been proposed as a

316 potential cause of cognitive decline, studies showed that dialysis prescription did not reverse  
317 symptoms of cognitive impairment<sup>52</sup>. Co-occurrence of other conditions, such as, i) metabolic  
318 syndrome (defined by the presence of metabolic abnormalities including obesity, glucose  
319 intolerance, and elevated blood pressure), cardiovascular disease, and liver disease (Cluster  
320 2, 3 and 5)<sup>53,54</sup>; ii) mental disorders and heart disease (Cluster 6)<sup>55</sup>, and iii) cancer with obesity  
321 and diabetes (Cluster 4)<sup>56</sup> has also been broadly documented and shown to be associated  
322 with high mortality. Therefore, the identification of these multimorbidity patterns among  
323 hospitalized individuals with COVID-19 can help identify opportunities to target patient-centred  
324 care towards people with high-risk ages and a specific combination of health conditions,  
325 leading to improved clinical outcomes. Note that we acknowledge that a presence of a specific  
326 chronic disease or a combination of chronic diseases in our analytic sample may have acted  
327 as an effect modifier of COVID-19 death but could also be associated with COVID-19 death  
328 via the existence of another common cause i.e., other clinical characteristics or socio-  
329 economic factors not included in our study.

330 The strengths of our study include the large, regional cohort of hospitalised COVID-19  
331 patients, providing high statistical power to investigate associations between different risk  
332 factors and COVID-19 in-hospital mortality. The use of ICD-10 diagnosis codes assigned by  
333 medical professionals working in all hospitals throughout Northern Ireland meant that  
334 comprehensive information on a wide range of comorbidities were available. Our results  
335 remained robust in a number of sensitivity analyses and reinforced previous findings of a  
336 higher risk of COVID-19-related death associated with obesity<sup>12</sup>, liver disease<sup>57</sup>, renal  
337 disease<sup>5</sup>, metastatic cancer<sup>58</sup>, congestive heart failure<sup>59</sup>, and COPD<sup>19</sup>. Furthermore, we  
338 investigated the associations between several conditions for which little data exist regarding  
339 risk for in-hospital mortality in patients with COVID-19, such as hypothyroidism, solid tumour  
340 without metastasis, lymphoma, dementia, and other neurological disorders. We also added to  
341 the, so far inconclusive, evidence on the role of asthma in influencing COVID-19-related  
342 outcomes. Finally, given a paucity of research on the impact of multimorbidity on the risk of

343 COVID-19 in-hospital mortality, we examined the association between increasing  
344 multimorbidity, multimorbidity patterns, and COVID-19-related death. To our knowledge, this  
345 is the first study to characterise patterns of multimorbidity in a hospitalised population with  
346 COVID 19 using an unsupervised machine learning approach.

347 The interpretation of our results should be made considering several limitations. First, due to  
348 unavailability of ICD-10 diagnosis codes, we were unable to consider the records of 552  
349 patients with COVID-19, admitted to hospital in the period from March 1, 2020, to January 31,  
350 2021. Furthermore, we have only used the comorbidity data collected in the studied period.  
351 Therefore, it is possible we missed some comorbidities by not including information reported  
352 at prior admissions. Second, the underlying cause of death was allocated based on the  
353 hospital records of ICD-10 diagnostic coding and discharge status, not death certificate; this  
354 might have led not only to the underestimation of the real magnitude of mortality due to  
355 COVID-19 but also potential misclassification of deaths from other causes. To assess the  
356 extent to which these inaccuracies may have affected our estimates, a similar analysis should  
357 be performed in the future using death certificate–based ICD-10 diagnosis codes. Third, since  
358 the ICD-10 diagnosis codes were assigned by medical professionals working in different  
359 hospitals, they may not have captured intended disease concepts with complete consistency.  
360 Fourth, our analysis is cross-sectional, meaning that both the independent variables and the  
361 outcome were collected simultaneously. Although the central element of the cross-sectional  
362 design is the lack of the temporal information required to describe the evolution of the  
363 underlying dynamics, in case of our study, the temporal link between the outcome and  
364 independent variables can be cautiously assumed since the presence of underlying health  
365 conditions most likely preceded the outcome studied (i.e., fatal/non-fatal hospitalization due  
366 to COVID-19). Fifth, the impact of inpatient treatment or procedures performed during  
367 hospitalisation as well as the information on the duration of the long-term conditions on patient  
368 outcomes was not considered in this study. In addition, unavailability of data on clinical  
369 parameters such as oxygen and ventilation treatment limited the opportunity of a more

370 comprehensive analysis including multiple levels of severity as the outcome. Sixth, the  
371 purpose of using the clustering approach was for this method to potentially become part of the  
372 pipeline for discovering the various multimorbidity profiles that are associated with mortality  
373 due to COVID-19. Extensions to this research may include a more robust look at the effects  
374 of the hyperparameters and different analytic samples on the associations between different  
375 disease groups and COVID-19-related deaths. Furthermore, the results of the clustering  
376 algorithm should be further validated by domain experts to determine its clinical utility. It is  
377 important to highlight that this analysis was performed among a cohort of individuals  
378 hospitalized with COVID-19 and may not be generalizable to those non-hospitalized. The lack  
379 of data on non-hospitalized individuals with SARS-CoV-2 infection limited our ability to  
380 examine utilization of our algorithm outside of the hospitalized patients. However, our  
381 population represented a diverse cohort with a variety of comorbidities and is representative  
382 of high-risk individuals across Northern Ireland. Seventh, as mentioned above, our analytic  
383 sample does not represent a true random selection from the population since it is solely based  
384 on hospitalised patients, that died or did not die during the admission episode following  
385 COVID-19 diagnosis. This non-randomness of sample selection may have had an impact on  
386 our study results. Older adults, those obese, and with pre-existing medical conditions are more  
387 susceptible to adverse COVID-19 outcomes, while COVID-19 severity likely influences  
388 hospitalisation<sup>60</sup>. As such, characteristics related to our sample inclusion, also relate to the  
389 hypothesised risk factors and the outcome of interest and hence, investigating these factors  
390 within hospitalised patients may have introduced the possibility of collider bias. In future work,  
391 the likelihood and extent of collider bias associated with sample selection could be evaluated  
392 by comparing means, variances, and distributions of variables in the sample of individuals with  
393 COVID-19 that have been hospitalized with those in a representative sample of the NI  
394 population<sup>61</sup>. This could not be evaluated in the current data set. Finally, our study may be  
395 subject to other potential sources of bias. For example, selection bias could have been  
396 introduced by not including non-hospitalized individuals living in long-term care or assisted  
397 living facilities that suffered from severe COVID-19 symptoms and subsequently died due to

398 COVID-19<sup>62</sup>. Bias due to omission of a confounder from the model (unmeasured confounder)  
399 is also a possibility. Several demographic factors (e.g., race/ethnicity, disability status, socio-  
400 economic status), as well as structural factors (e.g., literacy) were not included in the  
401 analysis<sup>63-66</sup>. Moreover, we did not control for the effect of concurrently prescribed medications  
402 such as antipsychotics, proton pump inhibitors, antihistamines, and opioid analgesics that  
403 were previously shown to increase the risk of adverse outcomes among patients with COVID-  
404 19<sup>67</sup>. The association between certain drug classes, polypharmacy, and the risk of COVID-19  
405 mortality should be addressed in future work. In addition, further analysis on host-specific  
406 genetic factors and their relationships with severe manifestations of COVID-19, in particular,  
407 in individuals with no underlying health conditions that died as a direct consequence of SARS-  
408 CoV-2 infection, could allow us to better understand relationships between environmental risk  
409 factors and severe outcomes associated with COVID-19 and identify potential targets for  
410 therapeutic development.

411 This study estimated the impact of the broad spectrum of comorbidities on COVID-19 in-  
412 hospital mortality using a large, regional cohort of hospitalized patients. We found that  
413 individuals with lymphoma, metastatic cancer, solid tumour without metastasis, liver disease,  
414 congestive heart failure, chronic obstructive pulmonary disease, obesity, renal disease, and  
415 dementia were at significantly increased risk for COVID-19-related death. In addition, we  
416 showed that the presence of multiple coexisting health conditions further increased odds of  
417 death. Given that effective clinical management of patients with multimorbidity is therefore a  
418 critical step towards their survival from COVID-19, multidisciplinary clinical teams should  
419 prepare comprehensive care plans that can be streamlined and meet the dynamic needs of  
420 such patients. Future work should investigate the associations between different patterns of  
421 multimorbidity and COVID-19 mortality to better characterize those individuals who would  
422 benefit from enhanced preventive measures.

## 423 **Methods**



#### 424 *Study design and study population*

425 This retrospective cohort study was conducted using the Patient Administration System (PAS)  
426 data from Northern Ireland, covering the period from March 1, 2020, to January 31, 2021. The  
427 PAS data includes patient level data on hospital admissions, transfers, and discharges for all  
428 NHS Trusts in Northern Ireland. In total, 8524 records identified as COVID-19 hospital  
429 admissions (using PAS admission codes) were initially selected for analysis (Fig.1). We then  
430 excluded n = 1075 patients that were not clinically, epidemiologically, or laboratory-confirmed  
431 COVID-19 cases as indicated by COVID-19-related ICD-10 diagnostic codes of U07.1 and  
432 U07.2, leaving 7449 patients eligible for analysis. Next, we excluded n = 552 patients for whom  
433 ICD-10 codes of U07.1 and U07.2 were not recorded. In effect, analyses were restricted to n  
434 = 6897 patients with ICD-10 codes for COVID-19, including the primary or secondary  
435 diagnosis code of U07.1 and U07.2, with complete ICD-10 data on underlying conditions.  
436 Finally, we combined the ICD-10 diagnosis codes from multiple hospitalizations due to  
437 COVID-19, including transfers between or within hospitals, and removed the duplicate ICD-10  
438 codes (n = 861). Note that the discharge code of the most recent hospital stay was used for  
439 patients with multiple records of hospital admissions. This resulted in a subset of 6036  
440 hospitalized COVID-19 cases included in the analysis. Specifically, we compared  
441 characteristics of COVID-19 patients that were discharged from hospitals (n = 4811) with those  
442 that died in hospital during the admission episode following COVID-19 diagnosis (n = 1225).  
443 Fig. 1. shows the stages of the selection process.

#### 444 *Outcomes*

445 The outcome used in our analysis were hospital discharge and in-hospital COVID-19-related  
446 death, defined on the basis of a discharge status and the International Classification of  
447 Diseases (version 10; ICD-10) code diagnosis, of U07.1 ("COVID-19, virus identified") or  
448 U07.2 ("COVID-19, virus not identified"), recorded as either a primary or secondary diagnosis  
449 to ensure the inclusion of all people who had COVID-19 in hospital<sup>68</sup>. Specifically, U07.1 code  
450 was assigned when COVID-19 was confirmed by laboratory testing irrespective of severity of

451 clinical signs or symptoms while U07.2 code was used when COVID-19 was diagnosed  
452 clinically or epidemiologically but laboratory testing was inconclusive or not available. For  
453 patients with multiple records of hospital admissions identified as COVID-19 hospital  
454 admissions, including those transferred between or within hospitals, the discharge code of the  
455 most recent hospital stay, was considered the outcome measure. Therefore, the same person  
456 was not included more than once in the analytic sample while all in-hospital COVID-19-related  
457 deaths were counted. The presence of specific comorbidities in patients with multiple records  
458 was established by combining the ICD-10 diagnosis codes from all visits and removing the  
459 duplicate codes.

#### 460 *Covariates*

461 We examined the following patient-level data for each admission: (i) demographics (age, sex);  
462 and (ii) ICD-10 diagnosis codes that were used to identify common comorbidities. The  
463 presence of specific comorbidities in patients with multiple records of hospital admissions,  
464 including those transferred between or within hospitals, was established by combining the  
465 ICD-10 diagnosis codes from all considered visits and removing the duplicate codes.  
466 Subsequently, the discharge code of the most recent hospital stay for a patient with multiple  
467 records of hospital admissions was considered the outcome measure. The ICD-10 coding  
468 criteria for all comorbidities were adapted from the Elixhauser comorbidity measure<sup>69</sup>.  
469 Accordingly, the following comorbidities were considered: congestive heart failure (I09.9,  
470 I11.0, I13.0, I13.2, I25.5, I42.0, I42.5 - I42.9, I43.x, I50.x, P29.0), cardiac arrhythmias (I44.1 -  
471 I44.3, I45.6, I45.9, I47.x - I49.x, R00.0, R00.1, R00.8, T82.1, Z45.0, Z95.0), chronic obstructive  
472 pulmonary disease (I27.8, I27.9, J40.x - J47.x, J60.x - J67.x, J68.4, J70.1, J70.3), diabetes  
473 including uncomplicated (E10.0, E10.1, E10.9, E11.0, E11.1, E11.9, E12.0, E12.1, E12.9,  
474 E13.0, E13.1, E13.9, E14.0, E14.1, E14.9) and complicated cases (E10.2 - E10.8, E11.2 -  
475 E11.8, E12.2 - E12.8, E13.2 - E13.8, E14.2 - E14.8), hypertension (I10.x, I11.x - I13.x, I15.x),  
476 hypothyroidism (E00.x - E03.x, E89.0), renal disease (I12.0, I13.1, N03.2 - N03.7, N05.2 -  
477 N05.7, N18.x, N19.x, N25.0, Z49.0 - Z49.2, Z94.0, Z99.2), liver disease (B18.x, I85.x, I86.4,

478 I98.2, K70.x, K71.1, K71.3 - K71.5, K71.7, K72.x - K74.x, K76.0, K76.2 - K76.9, Z94.4),  
479 lymphoma (C81.x - C85.x, C88.x, C96.x, C90.0, C90.2), metastatic cancer (C77.x - C80.x),  
480 solid tumour without metastasis (C00.x - C26.x, C30.x - C34.x, C37.x - C41.x, C43.x, C45.x -  
481 C58.x, C60.x - C76.x, C97.x), rheumatoid arthritis/collagen vascular diseases (L94.0, L94.1,  
482 L94.3, M05.x, M06.x, M08.x, M12.0, M12.3, M30.x, M31.0 - M31.3, M32.x - M35.x, M45.x,  
483 M46.1, M46.8, M46.9), obesity (E66.x), depression (F20.4, F31.3 - F31.5, F32.x, F33.x, F34.1,  
484 F41.2, F43.2), dementia (F00.x - F03.x, F05.1, G30.x, G31.1), neurological disorders such as  
485 paralysis (G04.1, G11.4, G80.1, G80.2, G81.x, G82.x, G83.0 - G83.4, G83.9) and other  
486 neurological disorders (G10.x - G13.x, G20.x - G22.x, G25.4, G25.5, G31.2, G31.8, G31.9,  
487 G32.x, G35.x - G37.x, G40.x, G41.x, G93.1, G93.4, R47.0, R56.x), and asthma (J.45).

488 *Statistical analysis*

489 Descriptive statistics were provided using median (interquartile range [IQR]) for continuous  
490 variables and counts and percentages for categorical data. The Shapiro-Wilk test was used  
491 to determine if the data deviates from a normal distribution. The Wilcoxon rank sum test was  
492 applied to compare groups of continuous data. Statistical differences between groups of  
493 categorical variables were established with the Fisher test. A two-sided  $P < 0.05$  was  
494 considered statistically significant.

495 The association between patient characteristics and in-hospital mortality was examined using  
496 logistic regression models. Adjusted logistic regression analyses were presented as odds  
497 ratios (OR) with 95% confidence intervals (95%CI) and included age, sex, and pre-existing  
498 long-term conditions identified using ICD-10 coding rules. Statistical significance was  
499 determined using the Wald's test. Non-linear dependence between age and the outcome  
500 measure was evaluated by comparing the generalised additive model with linear and spline  
501 terms for age against the model with only a linear term. The likelihood-ratio  $\chi^2$  test indicated  
502 that linearity assumption was not satisfied ( $p < 0.001$ ). We therefore grouped age into six  
503 categories (0-40, 40-50, 50-60, 60-70, 70-80 and  $\geq 80$  years) since odds ratios calculated for  
504 variables modelled as polynomials in the model, are not directly interpretable. Additionally, we  
505 provided the odds ratios adjusted for age parametrised as a 4-knot restricted cubic spline in  
506 the Supplementary Material (Table S1 in Supplementary Material). Furthermore, the non-  
507 linear relationship between age and the risk of death involving COVID-19 is shown in Fig. F1  
508 in Supplementary Material.

509 We investigated the potential effect of having multiple pre-existing long-term conditions on the  
510 outcome measure (hospital discharge vs. in-hospital COVID-19-related death). The analysis  
511 was conducted for the total population and stratified by sex. Comorbidities were expressed as  
512 categorical variables from 0 to 2, then 3 or higher. The model including categories of  
513 comorbidities was adjusted for age and sex in the analysis including all patients and age only

514 in the sex-stratified analysis, with age modelled as a polynomial in the logistic regression  
515 model.

516 We further investigated patterns of multimorbidity by performing a cluster analysis. First, we  
517 classified all considered health conditions into eight groups: 1) autoimmune diseases including  
518 rheumatoid arthritis and collagen vascular diseases; 2) metabolic and endocrine diseases  
519 including diabetes, hypothyroidism, and obesity; 3) respiratory diseases including chronic  
520 obstructive pulmonary disease and asthma; 4) cardiovascular diseases including  
521 hypertension, congestive heart failure, and cardiac arrhythmias; 5) mental and neurological  
522 disorders including depression, dementia, and neurological disorders; 6) neoplasms including  
523 lymphoma, metastatic cancer, and solid tumour without metastasis; 7) digestive system  
524 diseases including liver disease; and 8) genitourinary system diseases including renal  
525 diseases. To identify disease clusters within the analytic sample, we used the k-modes  
526 clustering approach, an unsupervised machine learning algorithm for grouping categorical  
527 data<sup>70</sup>. The method partitions the objects (patients) into a specified number of clusters such  
528 that the distance from objects to the assigned cluster modes is minimized. We used the  
529 Hamming distance to determine the dissimilarity of two objects. The optimal number of  
530 clusters was determined with the modified Elbow method using within-cluster differences<sup>71</sup>.  
531 Frequencies and percentages of disease groups were then calculated for each cluster.  
532 Descriptive statistics of age and in-hospital mortality in patients with COVID-19 were also  
533 provided for each cluster. All analyses were conducted using R Studio v.1.2.5033 operating  
534 R v.3.6.3.

### 535 *Sensitivity analysis*

536 Four sensitivity analyses were performed to validate the robustness of the main findings. First,  
537 COVID-19-related deaths were defined as COVID-19 related admissions with ICD-10 code  
538 diagnosis, including only primary or secondary diagnosis code of U07.1 which is likely to  
539 have a greater degree of specificity. Second, COVID-19-related deaths were defined as  
540 COVID-19 related admissions with ICD-10 diagnosis code U07.1 or U07.2 as the primary code

541 for clinical diagnosis. Note that U07.1 code represents cases when COVID-19 was confirmed  
542 by laboratory testing while U07.2 code corresponds to COVID-19 cases that were diagnosed  
543 clinically or epidemiologically since laboratory testing was inconclusive or not available. Third,  
544 to assess the relative importance of underlying health conditions to adverse outcomes, we  
545 compared the risk of death from COVID-19 in individuals with comorbidity and those with no  
546 recorded comorbidity, adjusting for sex and age parametrised as a 4-knot restricted cubic  
547 spline. Finally, since asthma was found to be associated with a decreased risk of COVID-19-  
548 related death, we also performed a fourth sensitivity analysis to compare the risk of death from  
549 COVID-19 in people with asthma and those with no documented comorbidities. The model  
550 was adjusted for sex and age parametrised as a 4-knot restricted cubic spline.

#### 551 *Ethical considerations*

552 The study and data collection were approved by the Office for Research Ethics Committees  
553 Northern Ireland (20/0062). We followed the ethical standards set by the Helsinki Declaration  
554 of 1964, as revised in 2013, and the research guidelines of the University of Ulster. The Office  
555 for Research Ethics Committees Northern Ireland considered the collection of routine data as  
556 evaluation of service and waived the need for written informed consent. The Office for  
557 Research Ethics Committees Northern Ireland approved the publication of results. We  
558 followed the Strengthening the Reporting of Observational Studies in Epidemiology (STROBE)  
559 guidelines<sup>72</sup>.

560 **References**

- 561 1 Guan, W.J. et al. Clinical characteristics of coronavirus disease 2019 in China. *New*  
562 *England journal of medicine*. 382(18), 1708-1720 (2020).
- 563 2 Sun, P. et al. Clinical characteristics of hospitalized patients with SARS-CoV-2 infection:  
564 a single arm meta-analysis. *Journal of medical virology*. 92(6), 612-617 (2020).
- 565 3 Williamson, E.J. et al. Factors associated with COVID-19-related death using  
566 OpenSAFELY. *Nature*. 584(7821), 430-436 (2020).
- 567 4 Deng, G., Yin, M., Chen, X., Zeng, F. Clinical determinants for fatality of 44,672 patients  
568 with COVID-19. *Critical Care*. 24, 1-3 (2020).
- 569 5 Docherty, A.B. et al. Features of 20 133 UK patients in hospital with covid-19 using the  
570 ISARIC WHO Clinical Characterisation Protocol: prospective observational cohort study.  
571 *BMJ*. 369 (2020).
- 572 6 Bae, S. et al. Impact of cardiovascular disease and risk factors on fatal outcomes in  
573 patients with COVID-19 according to age: a systematic review and meta-analysis. *Heart*.  
574 107(5), 373-380 (2021).
- 575 7 Chen, T. et al. Clinical characteristics of 113 deceased patients with coronavirus disease  
576 2019: retrospective study. *BMJ*. 368 (2020).
- 577 8 Yang, J. et al. Prevalence of comorbidities in the novel Wuhan coronavirus (COVID-19)  
578 infection: a systematic review and meta-analysis. *Int J Infect Dis*.10 (2020).
- 579 9 Meng, Y. et al. Cancer history is an independent risk factor for mortality in hospitalized  
580 COVID-19 patients: a propensity score-matched analysis. *Journal of Hematology &*  
581 *Oncology*. 2020;13(1):1-1.
- 582 10 Henry, B.M., Lippi, G. Chronic kidney disease is associated with severe coronavirus  
583 disease 2019 (COVID-19) infection. *International Urology and Nephrology*. 52(6), 1193-  
584 1194 (2020).
- 585 11 Lighter, J. et al. Obesity in patients younger than 60 years is a risk factor for Covid-19  
586 hospital admission. *Clinical Infectious Diseases*. 71(15), 896-897 (2020).

- 587 12 Dietz, W., Santos-Burgoa, C. Obesity and its implications for COVID-19 mortality.  
588 *Obesity*. 28(6):1005 (2020).
- 589 13 National Records of Scotland. *Deaths involving coronavirus (COVID-19) in Scotland*.  
590 (2021).
- 591 14 Chen, N. et al. Epidemiological and clinical characteristics of 99 cases of 2019 novel  
592 coronavirus pneumonia in Wuhan, China: a descriptive study. *The Lancet*. 395(10223),  
593 507-513 (2020).
- 594 15 Wu, Z., McGoogan, J.M. Characteristics of and important lessons from the coronavirus  
595 disease 2019 (COVID-19) outbreak in China: summary of a report of 72 314 cases from  
596 the Chinese Center for Disease Control and Prevention. *JAMA*. 323(13), 1239-1242  
597 (2020).
- 598 16 Docherty, A. B. et al. Features of 20 133 UK patients in hospital with covid-19 using the  
599 ISARIC WHO Clinical Characterisation Protocol: prospective observational cohort study.  
600 *BMJ*, 369, m1985, 10.1136/bmj.m1985 (2020).
- 601 17 Popkin, B.M. et al. Individuals with obesity and COVID-19: A global perspective on the  
602 epidemiology and biological relationships. *Obesity Reviews*. 21(11), e13128 (2020).
- 603 18 Simonnet, A. et al. LICORN and the Lille COVID-19 and Obesity Study Group. High  
604 prevalence of obesity in severe acute respiratory syndrome coronavirus-2 (SARS-CoV-2)  
605 requiring invasive mechanical ventilation. *Obesity*. 28(7), 1195-1199 (2020).
- 606 19 Gerayeli, F.V. et al. COPD and the risk of poor outcomes in COVID-19: A systematic  
607 review and meta-analysis. *EClinicalMedicine*. 33, 100789 (2021).
- 608 20 Alqahtani J.S. et al. Prevalence, severity and mortality associated with COPD and  
609 smoking in patients with COVID-19: a rapid systematic review and meta-analysis. *PloS*  
610 *One*. 15(5), e0233147 (2020).
- 611 21 Rabbani, G. et al. Pre-existing COPD is associated with an increased risk of mortality and  
612 severity in COVID-19: a rapid systematic review and meta-analysis. *Expert Review of*  
613 *Respiratory Medicine*. 15(5), 705-716 (2021).



- 614 22 Wang, Q., Davis, P.B., Gurney, M.E., Xu, R. COVID-19 and dementia: Analyses of risk,  
615 disparity, and outcomes from electronic health records in the US. *Alzheimer's & Dementia*.  
616 7(8), 1297-1306 (2021).
- 617 23 Tahira, A.C., Verjovski-Almeida, S., Ferreira, S.T. Dementia is an age-independent risk  
618 factor for severity and death in COVID-19 inpatients. *Alzheimer's & Dementia*. 17(11),  
619 1818-1831 (2021).
- 620 24 Kuo, C.L. et al. APOE e4 genotype predicts severe COVID-19 in the UK Biobank  
621 community cohort. *The Journals of Gerontology: Series A*. 75(11), 2231-2232 (2020).
- 622 25 Sweeney, M.D., Sagare, A.P., Zlokovic, B.V. Blood-brain barrier breakdown in Alzheimer  
623 disease and other neurodegenerative disorders. *Nat Rev Neurol*. 14(3), 133 (2018).
- 624 26 Ueno, M. et al. Blood-brain barrier damage in vascular dementia. *Neuropathology*. 36(2),  
625 115-124 (2016).
- 626 27 Reilev, M., et al. Characteristics and predictors of hospitalization and death in the first 11  
627 122 cases with a positive RT-PCR test for SARS-CoV-2 in Denmark: a nationwide cohort.  
628 *International Journal of Epidemiology*. 49(5), 1468-1481 (2020).
- 629 28 Tomasoni, D. et al. COVID-19 and heart failure: from infection to inflammation and  
630 angiotensin II stimulation. Searching for evidence from a new disease. *European Journal*  
631 *of Heart Failure*. 22(6), 957-66 (2020).
- 632 29 Hirsch, J.S. et al. Acute kidney injury in patients hospitalized with COVID-19. *Kidney*  
633 *International*. 98(1), 209-218 (2020).
- 634 30 Yang, R., Gui, X., Zhang, Y., Xiong, Y. The role of essential organ-based comorbidities in  
635 the prognosis of COVID-19 infection patients. *Expert Review of Respiratory Medicine*.  
636 14(8), 835-838 (2020).
- 637 31 Sattar, N., McInnes, I.B., McMurray, J.J.V. Obesity a risk factor for severe COVID-19  
638 infection: multiple potential mechanisms. *Circulation*. 142(1), 4-6 (2020).
- 639 32 Caussy, C., Wallet, F., Laville, M., Disse, E. Obesity is associated with severe forms of  
640 COVID-19. *Obesity*. 28(7), 1175 (2020).

- 641 33 Rottoli, M. et al. How important is obesity as a risk factor for respiratory failure, intensive  
642 care admission and death in hospitalised COVID-19 patients? Results from a single Italian  
643 Centre. *Eur J Endocrinol.* 183(4), 389–397 (2020).
- 644 34 Asthma UK. *Asthma facts and statistics*. [https://www.asthma.org.uk/about/media/facts-  
645 and-statistics/](https://www.asthma.org.uk/about/media/facts-and-statistics/) (2017).
- 646 35 Davies, J.M. et al. Budesonide and formoterol reduce early innate anti-viral immune  
647 responses in vitro. *PLoS One.* 6(11), e27898 (2011).
- 648 36 Simpson J.L. et al. Reduced antiviral interferon production in poorly controlled asthma is  
649 associated with neutrophilic inflammation and high-dose inhaled corticosteroids. *Chest.*  
650 149(3), 704-713 (2016).
- 651 37 Singanayagam, A. et al. Corticosteroid suppression of antiviral immunity increases  
652 bacterial loads and mucus production in COPD exacerbations. *Nature Communications.*  
653 9(1), 1-6 (2018).
- 654 38 Khawaja, A.P. et al. Associations with covid-19 hospitalisation amongst 406,793 adults:  
655 the UK Biobank prospective cohort study. *MedRxiv.* 10.1101/2020.05.06.20092957  
656 (2020).
- 657 39 Sunjaya, A.P., Allida, S.M., Di Tanna, G.L., Jenkins, C.R. Asthma and COVID-19 risk: a  
658 systematic review and meta-analysis. *European Respiratory Journal*, 59(3) (2022).
- 659 40 Hou, H., Xu, J., Li, Y., Wang, Y., Yang, H. The association of asthma with COVID-19  
660 mortality: an updated meta-analysis based on adjusted effect estimates. *The Journal of*  
661 *Allergy and Clinical Immunology: In Practice*, 9(11), 3944-3968 (2021).
- 662 41 Zhu, Z. et al. Association of asthma and its genetic predisposition with the risk of severe  
663 COVID-19. *Journal of Allergy and Clinical Immunology.* 146(2), 327-329 (2020).
- 664 42 Akenroye, A.T., Wood, R., Keet, C. Asthma, biologics, corticosteroids, and coronavirus  
665 disease 2019. *Ann Allergy Asthma Immunol.* 125(1), 12-13 (2020).
- 666 43 Petersen, E. et al. Comparing SARS-CoV-2 with SARS-CoV and influenza pandemics.  
667 *The Lancet Infectious Diseases*, 20(9), e238-e244 (2020).

- 668 44 Mueller, A.L., McNamara, M.S., Sinclair, D.A. Why does COVID-19 disproportionately  
669 affect older people? *Aging*. 12(10), 9959 (2020).
- 670 45 Fernández-Niño, J.A., Guerra-Gómez, J.A. and Idrovo, A.J., 2020. Multimorbidity patterns  
671 among COVID-19 deaths: proposal for the construction of etiological models. *Rev Panam*  
672 *Salud Publica*. 44:e166 (2020).
- 673 46 Iaccarino, G. et al. Age and multimorbidity predict death among COVID-19 patients:  
674 results of the SARS-RAS study of the Italian Society of Hypertension. *Hypertension*.  
675 76(2), 366-372 (2020).
- 676 47 Kim, L. et al. Risk factors for intensive care unit admission and in-hospital mortality among  
677 hospitalized adults identified through the US coronavirus disease 2019 (COVID-19)-  
678 associated hospitalization surveillance network (COVID-NET). *Clinical Infectious*  
679 *Diseases*. 72(9), e206-e214 (2021).
- 680 48 McQueenie, R. et al. Multimorbidity, polypharmacy, and COVID-19 infection within the UK  
681 Biobank cohort. *PloS One*. 15(8), e0238091 (2020).
- 682 49 Sin, D.D., Man, S.P. Why are patients with chronic obstructive pulmonary disease at  
683 increased risk of cardiovascular diseases? The potential role of systemic inflammation in  
684 chronic obstructive pulmonary disease. *Circulation*. 107(11), 1514-1519 (2003).
- 685 50 Maclay, J.D., MacNee, W. Cardiovascular disease in COPD: mechanisms. *Chest*. 143(3),  
686 798-807 (2013).
- 687 51 Silva, S.T.D., Ribeiro, R.D.C.L., Rosa, C.D.O.B., Cotta, R.M.M. Cognitive capacity in  
688 individuals with chronic kidney disease: relation to demographic and clinical  
689 characteristics. *Brazilian Journal of Nephrology*. 36, 163-170 (2014).
- 690 52 Radic, J. et al. The possible impact of dialysis modality on cognitive function in chronic  
691 dialysis patients. *Neth J Med*. 68(4), 153-7 (2010).
- 692 53 Cheong, K.C. et al. Association of metabolic syndrome with risk of cardiovascular disease  
693 mortality and all-cause mortality among Malaysian adults: a retrospective cohort study.  
694 *BMJ Open*. 11(8), e047849 (2021).

695 54 Käräjämäki, A.J. et al. Non-alcoholic fatty liver disease with and without metabolic  
696 syndrome: different long-term outcomes. *Metabolism*. 66, 55-63 (2017).

697 55 De Hert, M., Detraux, J., Vancampfort, D. The intriguing relationship between coronary  
698 heart disease and mental disorders. *Dialogues in clinical neuroscience*. 20(1), 31–40  
699 (2022).

700 56 Hawkins, M.L. et al. Endocrine and metabolic diseases among colorectal cancer  
701 survivors in a population-based cohort. *JNCI: Journal of the National Cancer Institute*.  
702 112(1), 78-86 (2020).

703 57 Galiero, R. et al. Impact of chronic liver disease upon admission on COVID-19 in-hospital  
704 mortality: Findings from COVOCA study. *PloS One*. 15(12), e0243700 (2020).

705 58 Lee, L.Y. et al. COVID-19 prevalence and mortality in patients with cancer and the effect  
706 of primary tumour subtype and patient demographics: a prospective cohort study. *The  
707 Lancet Oncology*. 21(10), 1309-1316 (2020).

708 59 Doolub, G. et al. Impact of COVID-19 on inpatient referral of acute heart failure: a single-  
709 centre experience from the south-west of the UK. *ESC Heart Failure*. 8(2), 1691-1695  
710 (2021).

711 60 de Lusignan, S. et al. Risk factors for SARS-CoV-2 among patients in the Oxford Royal  
712 College of General Practitioners Research and Surveillance Centre primary care network:  
713 a cross-sectional study. *The Lancet Infectious Diseases*, 20(9), 1034-1042 (2020).

714 61 Griffith, G.J. et al. 2020. Collider bias undermines our understanding of COVID-19  
715 disease risk and severity. *Nature communications*, 11(1), 1-12 (2020).

716 62 The Northern Ireland Statistics and Research Agency. *Covid-19 related deaths and pre-  
717 existing conditions in Northern Ireland: March 2020 to November 2021*.  
718 [nisra.gov.uk/sites/nisra.gov.uk/files/publications/C19-PEC-Nov21\\_0.pdf](https://www.nisra.gov.uk/sites/nisra.gov.uk/files/publications/C19-PEC-Nov21_0.pdf) (2021).

719 63 Raleigh, V.S. Ethnic differences in covid-19 death rates. *BMJ*. 376 (2022).

720 64 Bosworth, M.L. et al. Deaths involving COVID-19 by self-reported disability status during  
721 the first two waves of the COVID-19 pandemic in England: a retrospective, population-  
722 based cohort study. *The Lancet Public Health*. 6(11), e817-e825 (2021).

723 65 Cifuentes, M.P., Rodriguez-Villamizar, L.A., Rojas-Botero, M.L., Alvarez-Moreno, C.A.  
724 and Fernández-Niño, J.A. Socioeconomic inequalities associated with mortality for  
725 COVID-19 in Colombia: a cohort nationwide study. *J Epidemiol Community Health*. 75(7),  
726 610-615 (2021).

727 66 Paakkari, L. and Okan, O. COVID-19: health literacy is an underestimated problem. *The*  
728 *Lancet Public Health*. 5(5), e249-e250 (2020).

729 67 McKeigue, P.M. et al. Relation of severe COVID-19 to polypharmacy and prescribing of  
730 psychotropic drugs: the REACT-SCOT case-control study. *BMC Medicine*. 19(1), 1-11  
731 (2021).

732 68 Quan, H. et al. Coding algorithms for defining comorbidities in ICD-9-CM and ICD-10  
733 administrative data. *Medical Care*. 43(11), 1130-1139 (2005).

734 69 van Walraven, C., Austin, P.C., Jennings, A., Quan, H., Forster, A.J. A modification of the  
735 Elixhauser comorbidity measures into a point system for hospital death using  
736 administrative data. *Medical Care*. 47(6), 626-633 (2009).

737 70 Huang, Z. A fast clustering algorithm to cluster very large categorical data sets in data  
738 mining. *In KDD: Techniques and Applications* (H. Lu, H. Motoda and H. Luu, Eds.). 21-  
739 34, World Scientific, Singapore (1997).

740 71 Shalev-Shwartz, S. and Ben-David, S. Understanding machine learning: From theory to  
741 algorithms. Cambridge University Press (2014).

742 72 Vandembroucke, J.P. et al. Strobe Initiative. Strengthening the Reporting of Observational  
743 Studies in Epidemiology (STROBE): explanation and elaboration. *PLoS Medicine*. 4(10),  
744 e297 (2007).

## 745 **Acknowledgements**

746 The authors wish to thank the Information Team, Performance Management Service  
747 Improvement Directorate, HSCB for assisting in the collation of the data.

## 748 **Author contributions**

749 MB, AJB, HVW conceptualized the study. MB analysed the data. MB, DeB, DaB, LP, DG, AJB  
750 contributed to interpretation of the results. MB took the lead in writing the first draft. MB, DeB,  
751 DaB, LP, RS, HVW, DG, AJB critically reviewed the manuscript. All authors approved the final  
752 manuscript.

## 753 **Competing interests**

754 The authors declare no competing interests.

## 755 **Data availability**

756 De-identified study data are available for access by accredited researchers in accordance with  
757 data sharing policies of HSCB Performance Management Service Improvement Directorate.

## 758 **Ethical considerations**

759 The study and data collection were approved by the Office for Research Ethics Committees  
760 Northern Ireland (20/0062). We followed the ethical standards set by the Helsinki Declaration  
761 of 1964, as revised in 2013, and the research guidelines of the University of Ulster. The Office  
762 for Research Ethics Committees Northern Ireland considered the collection of routine data as  
763 evaluation of service and waived the need for written informed consent. The Office for  
764 Research Ethics Committees Northern Ireland approved the publication of results.

765 **Figures**

766 **Fig. 1.** Flow diagram indicating the selection of study participants.

768 **Table 1.** Demographic and clinical characteristics of patients.

|                                                        | Discharged<br>(n = 4811) | Died<br>(n = 1225) | <i>P</i> value    |
|--------------------------------------------------------|--------------------------|--------------------|-------------------|
| Age, median (IQR)                                      | 68 (54-80)               | 80 (73-86)         | <b>&lt; 0.001</b> |
| Sex, n (%)                                             |                          |                    |                   |
| Female                                                 | 2309 (48.0)              | 514 (42.0)         | <b>&lt; 0.001</b> |
| Male                                                   | 2502 (52.0)              | 711 (58.0)         |                   |
| Congestive heart failure, n (%)                        |                          |                    |                   |
| No                                                     | 4599 (95.6)              | 1095 (89.4)        | <b>&lt; 0.001</b> |
| Yes                                                    | 212 (4.4)                | 130 (10.6)         |                   |
| Cardiac arrhythmias, n (%)                             |                          |                    |                   |
| No                                                     | 4253 (88.4)              | 1030 (84.0)        | <b>&lt; 0.001</b> |
| Yes                                                    | 558 (11.6)               | 195 (16.0)         |                   |
| Chronic obstructive pulmonary disease, n (%)           |                          |                    |                   |
| No                                                     | 3885 (80.8)              | 958 (78.2)         | <b>0.049</b>      |
| Yes                                                    | 926 (19.2)               | 267 (21.8)         |                   |
| Diabetes, n (%)                                        |                          |                    |                   |
| No                                                     | 4086 (84.9)              | 1007 (82.2)        | <b>0.02</b>       |
| Yes                                                    | 725 (15.1)               | 218 (17.8)         |                   |
| Hypertension, n (%)                                    |                          |                    |                   |
| No                                                     | 3738 (77.7)              | 927 (75.7)         | 0.14              |
| Yes                                                    | 1073 (22.3)              | 298 (24.3)         |                   |
| Hypothyroidism, n (%)                                  |                          |                    |                   |
| No                                                     | 4629 (96.2)              | 1188 (97.0)        | 0.23              |
| Yes                                                    | 182 (3.8)                | 37 (3.0)           |                   |
| Renal disease, n (%)                                   |                          |                    |                   |
| No                                                     | 4402 (91.5)              | 985 (80.4)         | <b>&lt; 0.001</b> |
| Yes                                                    | 409 (8.5)                | 240 (19.6)         |                   |
| Liver disease, n (%)                                   |                          |                    |                   |
| No                                                     | 4740 (98.5)              | 1198 (97.8)        | 0.08              |
| Yes                                                    | 71 (1.5)                 | 27 (2.2)           |                   |
| Lymphoma, n (%)                                        |                          |                    |                   |
| No                                                     | 4771 (99.2)              | 1198 (97.8)        | <b>&lt; 0.001</b> |
| Yes                                                    | 40 (0.8)                 | 27 (2.2)           |                   |
| Metastatic cancer, n (%)                               |                          |                    |                   |
| No                                                     | 4766 (99.1)              | 1192 (97.3)        | <b>&lt; 0.001</b> |
| Yes                                                    | 45 (0.9)                 | 33 (2.7)           |                   |
| Solid tumour without metastasis, n (%)                 |                          |                    |                   |
| No                                                     | 4700 (97.7)              | 1155 (94.3)        | <b>&lt; 0.001</b> |
| Yes                                                    | 111 (2.3)                | 70 (5.7)           |                   |
| Rheumatoid arthritis/collagen vascular diseases, n (%) |                          |                    |                   |
| No                                                     | 4727 (98.3)              | 1203 (98.2)        | 0.9               |
| Yes                                                    | 84 (1.7)                 | 22 (1.8)           |                   |
| Obesity, n (%)                                         |                          |                    |                   |
| No                                                     | 4763 (99.0)              | 1204 (98.3)        | <b>0.049</b>      |
| Yes                                                    | 48 (1.0)                 | 21 (1.7)           |                   |
| Asthma, n (%)                                          |                          |                    |                   |
| No                                                     | 4403 (91.5)              | 1173 (95.8)        | <b>&lt; 0.001</b> |
| Yes                                                    | 408 (8.5)                | 52 (4.2)           |                   |
| Depression, n (%)                                      |                          |                    |                   |
| No                                                     | 4583 (95.3)              | 1205 (98.4)        | <b>&lt; 0.001</b> |
| Yes                                                    | 228 (4.7)                | 20 (1.6)           |                   |
| Dementia, n (%)                                        |                          |                    |                   |
| No                                                     | 4467 (92.9)              | 1038 (84.7)        | <b>&lt; 0.001</b> |
| Yes                                                    | 344 (7.1)                | 187 (15.3)         |                   |
| Neurological disorders, n (%)                          |                          |                    |                   |
| No                                                     | 4557 (94.7)              | 1153 (94.1)        |                   |
| Yes                                                    | 254 (5.3)                | 72 (5.9)           |                   |

Statistically significant  $P < 0.05$  values are in bold.



769 **Table 2.** Multivariable logistic regression analysis for factors associated with COVID-19-  
 770 related death.

| Characteristic                                   | Level | Number of deaths, n (%) | Adjusted odds ratio (95%CI) | P value           |
|--------------------------------------------------|-------|-------------------------|-----------------------------|-------------------|
| Age                                              | 40-49 | 10 (0.8)                | reference                   | -                 |
|                                                  | 0-39  | 5 (0.4)                 | 0.60 (0.20,1.77)            | 0.36              |
|                                                  | 50-59 | 60 (4.9)                | 3.62 (1.83,7.17)            | <b>&lt; 0.001</b> |
|                                                  | 60-69 | 176 (14.4)              | 8.98 (4.68,17.24)           | <b>&lt; 0.001</b> |
|                                                  | 70-79 | 370 (30.2)              | 14.53 (7.62,27.69)          | <b>&lt; 0.001</b> |
|                                                  | ≥ 80  | 604 (49.3)              | 23.77 (12.48,45.27)         | <b>&lt; 0.001</b> |
| Sex                                              | Male  | 711 (58.0)              | 1.41 (1.22,1.62)            | <b>&lt; 0.001</b> |
| Congestive heart failure                         | Yes   | 130 (10.6)              | 1.69 (1.32,2.15)            | <b>&lt; 0.001</b> |
| Cardiac arrhythmias                              | Yes   | 195 (16.0)              | 0.92 (0.76,1.11)            | 0.38              |
| COPD                                             | Yes   | 267 (21.8)              | 1.43 (1.18,1.72)            | <b>&lt; 0.001</b> |
| Diabetes                                         | Yes   | 218 (17.8)              | 1.13 (0.95,1.36)            | 0.17              |
| Hypertension                                     | Yes   | 298 (24.3)              | 0.94 (0.80,1.10)            | 0.43              |
| Hypothyroidism                                   | Yes   | 37 (3.0)                | 0.91 (0.62,1.34)            | 0.65              |
| Renal disease                                    | Yes   | 240 (19.6)              | 1.81 (1.51,2.19)            | <b>&lt; 0.001</b> |
| Liver disease                                    | Yes   | 27 (2.2)                | 2.50 (1.53,4.07)            | <b>&lt; 0.001</b> |
| Lymphoma                                         | Yes   | 27 (2.2)                | 2.78 (1.64,4.74)            | <b>&lt; 0.001</b> |
| Metastatic cancer                                | Yes   | 33 (2.7)                | 2.17 (1.25,3.77)            | <b>0.006</b>      |
| Solid tumour without metastasis                  | Yes   | 70 (5.7)                | 1.67 (1.16,2.41)            | <b>0.006</b>      |
| Rheumatoid arthritis/ collagen vascular diseases | Yes   | 22 (1.8)                | 1.08 (0.66,1.79)            | 0.78              |
| Obesity                                          | Yes   | 21 (1.7)                | 5.28 (2.92,9.52)            | <b>&lt; 0.001</b> |
| Asthma                                           | Yes   | 52 (4.2)                | 0.60 (0.42,0.86)            | <b>0.005</b>      |
| Depression                                       | Yes   | 20 (1.6)                | 0.62 (0.37,1.00)            | 0.05              |
| Dementia                                         | Yes   | 187 (15.3)              | 1.44 (1.17,1.76)            | <b>&lt; 0.001</b> |
| Neurological disorders                           | Yes   | 72 (5.9)                | 1.20 (0.90,1.61)            | 0.21              |

Statistically significant  $P < 0.05$  values are in bold.  
 Observations, n = 6036, including 1225 COVID-19 deaths  
 CI: Confidence Interval; COPD: Chronic obstructive pulmonary disease

771 **Table 3.** Number of pre-existing health conditions and risk of COVID-19-related death

| Pre-existing health condition: | ALL                 |                         |                                           |                   | MALES               |                         |                                           |                   | FEMALES             |                         |                                           |                   |
|--------------------------------|---------------------|-------------------------|-------------------------------------------|-------------------|---------------------|-------------------------|-------------------------------------------|-------------------|---------------------|-------------------------|-------------------------------------------|-------------------|
|                                | Total number, n (%) | Number of deaths, n (%) | Adjusted odds ratio (95%CI <sup>a</sup> ) | <i>P</i> value    | Total number, n (%) | Number of deaths, n (%) | Adjusted odds ratio (95%CI <sup>b</sup> ) | <i>P</i> value    | Total number, n (%) | Number of deaths, n (%) | Adjusted odds ratio (95%CI <sup>b</sup> ) | <i>P</i> value    |
| 0                              | 1713 (28.4)         | 187 (15.3)              | reference                                 |                   | 913 (28.4)          | 111 (15.6)              | reference                                 |                   | 800 (28.3)          | 76 (14.8)               | reference                                 |                   |
| 1                              | 2010 (33.3)         | 430 (35.1)              | 1.44 (1.18,1.75)                          | <b>&lt; 0.001</b> | 1104 (34.4)         | 245 (34.5)              | 1.34 (1.04,1.74)                          | <b>0.03</b>       | 906 (32.1)          | 185 (35.9)              | 1.56 (1.15,2.11)                          | <b>0.004</b>      |
| 2                              | 1507 (25.0)         | 394 (32.2)              | 1.79 (1.47,2.20)                          | <b>&lt; 0.001</b> | 826 (25.7)          | 239 (33.6)              | 1.84 (1.41,2.40)                          | <b>&lt; 0.001</b> | 681 (24.1)          | 155 (30.2)              | 1.74 (1.27,2.38)                          | <b>&lt; 0.001</b> |
| 3 or more                      | 806 (13.4)          | 214 (17.4)              | 1.80 (1.43,2.27)                          | <b>&lt; 0.001</b> | 370 (11.5)          | 116 (16.3)              | 2.00 (1.46,2.75)                          | <b>&lt; 0.001</b> | 436 (15.5)          | 98 (19.1)               | 1.63 (1.16,2.29)                          | <b>0.005</b>      |

<sup>a</sup> Adjusted odds ratios: adjusted for age and sex

<sup>b</sup> Adjusted odds ratios: adjusted for age

CI: Confidence Interval; COPD: Chronic obstructive pulmonary disease

772

773 **Table 4.** Multimorbidity clusters in a population of hospitalised patients with COVID-19. Values in bold correspond to three conditions with the  
 774 highest prevalence within patient groups (clusters of conditions). Underlined values represent other, less common conditions that have a higher  
 775 prevalence than in other groups.

|                           | <b>Cluster 1</b> | <b>Cluster 2</b> | <b>Cluster 3</b> | <b>Cluster 4</b> | <b>Cluster 5</b> | <b>Cluster 6</b> |
|---------------------------|------------------|------------------|------------------|------------------|------------------|------------------|
| Number of patients, n (%) | 1225 (20.3)      | 648 (10.7)       | 902 (14.9)       | 2293 (38.1)      | 682 (11.3)       | 286 (4.7)        |
| Age, median (IQR)         | 77 (67-85)       | 75 (59-83)       | 70 (59-79)       | 63 (49-78)       | 72 (61-82)       | 82 (74-86)       |
| <i>Disease group</i>      |                  |                  |                  |                  |                  |                  |
| Autoimmune (%)            | <u>2.1</u>       | 1.2              | 1.7              | 1.8              | 2.0              | 1.0              |
| Metabolic & endocrine (%) | 0.0              | <b>19.3</b>      | <b>12.7</b>      | <b>9.6</b>       | <b>100.0</b>     | 8.0              |
| Respiratory (%)           | <b>9.9</b>       | 8.6              | <b>100.0</b>     | 0.0              | 10.1             | <b>15.7</b>      |
| Cardiovascular (%)        | <b>100.0</b>     | 0.0              | <b>15.0</b>      | 0.0              | <b>69.1</b>      | <b>100.0</b>     |
| Mental & neurological (%) | 0.0              | <b>100.0</b>     | 5.5              | 0.0              | 4.4              | <b>100.0</b>     |
| Neoplasms (%)             | 4.2              | 2.5              | 4.3              | <b>5.9</b>       | 2.3              | 3.5              |
| Digestive (%)             | 1.6              | <u>2.5</u>       | 1.0              | 1.7              | 2.2              | 0.0              |
| Genitourinary (%)         | <b>15.6</b>      | <b>9.4</b>       | 6.0              | <b>9.0</b>       | <b>15.0</b>      | 12.2             |
| Mortality (%)             | 23.8             | 23.5             | 22.0             | 15.3             | 21.8             | 29.4             |

776

777 **Table 5.** Sensitivity analysis for the association between pre-existing health condition and in-  
 778 hospital mortality in patients with COVID-19. COVID-19-related deaths were defined as  
 779 COVID-19 related admissions with ICD-10 code diagnosis, including only primary or  
 780 secondary diagnosis code of U07.1.

| Characteristic                                   | Level | Number of deaths, n (%) | Adjusted odds ratio (95%CI) | P value           |
|--------------------------------------------------|-------|-------------------------|-----------------------------|-------------------|
| Age                                              | 40-49 | 10 (0.8)                | reference                   | -                 |
|                                                  | 0-39  | 5 (0.4)                 | 0.60 (0.20,1.77)            | 0.35              |
|                                                  | 50-59 | 59 (4.9)                | 3.54 (1.79,7.02)            | <b>&lt; 0.001</b> |
|                                                  | 60-69 | 174 (14.4)              | 8.73 (4.54,16.77)           | <b>&lt; 0.001</b> |
|                                                  | 70-79 | 366 (30.2)              | 14.24 (7.47,27.17)          | <b>&lt; 0.001</b> |
|                                                  | ≥ 80  | 598 (49.3)              | 23.12 (12.13,44.04)         | <b>&lt; 0.001</b> |
| Sex                                              | Male  | 704 (58.1)              | 1.40 (1.22,1.62)            | <b>&lt; 0.001</b> |
| Congestive heart failure                         | Yes   | 127 (10.5)              | 1.70 (1.33,2.18)            | <b>&lt; 0.001</b> |
| Cardiac arrhythmias                              | Yes   | 191 (15.8)              | 0.92 (0.76,1.12)            | 0.4               |
| COPD                                             | Yes   | 262 (21.6)              | 1.42 (1.18,1.71)            | <b>&lt; 0.001</b> |
| Diabetes                                         | Yes   | 217 (17.9)              | 1.14 (0.95,1.37)            | 0.16              |
| Hypertension                                     | Yes   | 296 (24.4)              | 0.94 (0.80,1.10)            | 0.44              |
| Hypothyroidism                                   | Yes   | 37 (3.0)                | 0.91 (0.62,1.34)            | 0.64              |
| Renal disease                                    | Yes   | 238 (19.6)              | 1.84 (1.52,2.21)            | <b>&lt; 0.001</b> |
| Liver disease                                    | Yes   | 27 (2.2)                | 2.46 (1.51,4.00)            | <b>&lt; 0.001</b> |
| Lymphoma                                         | Yes   | 27 (2.2)                | 2.78 (1.63,4.74)            | <b>&lt; 0.001</b> |
| Metastatic cancer                                | Yes   | 33 (2.7)                | 2.18 (1.25,3.79)            | <b>0.006</b>      |
| Solid tumour without metastasis                  | Yes   | 70 (5.8)                | 1.69 (1.17,2.45)            | <b>0.005</b>      |
| Rheumatoid arthritis/ collagen vascular diseases | Yes   | 21 (1.7)                | 1.01 (0.61,1.69)            | 0.96              |
| Obesity                                          | Yes   | 21 (1.7)                | 5.27 (2.92,9.51)            | <b>&lt; 0.001</b> |
| Asthma                                           | Yes   | 51 (4.2)                | 0.59 (0.42,0.85)            | <b>0.004</b>      |
| Depression                                       | Yes   | 20 (1.7)                | 0.63 (0.37,1.00)            | 0.05              |
| Dementia                                         | Yes   | 185 (15.3)              | 1.43 (1.17,1.76)            | <b>&lt; 0.001</b> |
| Neurological disorders                           | Yes   | 72 (5.9)                | 1.20 (0.90,1.61)            | 0.22              |

Statistically significant  $P < 0.05$  values are in bold.  
 Observations, n = 5955 including 1212 COVID-19 deaths  
 CI = Confidence Interval

781 **Table 6.** Sensitivity analysis for the association between pre-existing health conditions and in-  
782 hospital mortality in patients with COVID-19. COVID-19 deaths were defined as COVID-19  
783 related admissions with ICD-10 diagnosis code U07.1 or U07.2 as the primary code for clinical  
784 diagnosis.

| Characteristic                                   | Level | Number of deaths, n (%) | Adjusted odds ratio (95%CI) | P value           |
|--------------------------------------------------|-------|-------------------------|-----------------------------|-------------------|
| Age                                              | 40-49 | 9 (0.8)                 | reference                   | -                 |
|                                                  | 0-39  | 5 (0.4)                 | 0.93 (0.31,2.82)            | 0.90              |
|                                                  | 50-59 | 51 (4.7)                | 3.41 (1.65,7.02)            | <b>&lt; 0.001</b> |
|                                                  | 60-69 | 163 (15.0)              | 9.19 (4.62,18.27)           | <b>&lt; 0.001</b> |
|                                                  | 70-79 | 325 (29.8)              | 15.21 (7.7,30.06)           | <b>&lt; 0.001</b> |
|                                                  | ≥ 80  | 537 (49.3)              | 27.1 (13.72,53.54)          | <b>&lt; 0.001</b> |
| Sex                                              | Male  | 633 (58.1)              | 1.32 (1.14,1.54)            | <b>&lt; 0.001</b> |
| Congestive heart failure                         | Yes   | 112 (10.3)              | 1.75 (1.33,2.3)             | <b>&lt; 0.001</b> |
| Cardiac arrhythmias                              | Yes   | 175 (16.1)              | 0.97 (0.78,1.19)            | 0.75              |
| COPD                                             | Yes   | 254 (23.3)              | 1.39 (1.14,1.69)            | <b>0.001</b>      |
| Diabetes                                         | Yes   | 200 (18.3)              | 1.16 (0.96,1.41)            | 0.13              |
| Hypertension                                     | Yes   | 268 (24.6)              | 1.01 (0.85,1.2)             | 0.88              |
| Hypothyroidism                                   | Yes   | 32 (2.9)                | 0.87 (0.57,1.32)            | 0.50              |
| Renal disease                                    | Yes   | 220 (20.2)              | 1.82 (1.49,2.22)            | <b>&lt; 0.001</b> |
| Liver disease                                    | Yes   | 19 (1.7)                | 2.47 (1.36,4.49)            | <b>0.003</b>      |
| Lymphoma                                         | Yes   | 24 (2.2)                | 3.39 (1.86,6.2)             | <b>&lt; 0.001</b> |
| Metastatic cancer                                | Yes   | 27 (2.5)                | 2.11 (1.11,4.02)            | <b>0.02</b>       |
| Solid tumour without metastasis                  | Yes   | 59 (5.4)                | 2.08 (1.36,3.17)            | <b>&lt; 0.001</b> |
| Rheumatoid arthritis/ collagen vascular diseases | Yes   | 21 (1.9)                | 1.2 (0.71,2.04)             | 0.50              |
| Obesity                                          | Yes   | 20 (1.8)                | 5.06 (2.77,9.26)            | <b>&lt; 0.001</b> |
| Asthma                                           | Yes   | 50 (4.6)                | 0.61 (0.42,0.88)            | <b>0.008</b>      |
| Depression                                       | Yes   | 20 (1.8)                | 0.64 (0.39,1.05)            | 0.08              |
| Dementia                                         | Yes   | 169 (15.5)              | 1.52 (1.22,1.9)             | <b>&lt; 0.001</b> |
| Neurological disorders                           | Yes   | 61 (5.6)                | 1.45 (1.04,2.01)            | <b>0.03</b>       |

Statistically significant  $P < 0.05$  values are in bold.

Observations, n = 4960 including 1090 COVID-19 deaths

CI: Confidence Interval; COPD: Chronic obstructive pulmonary disease

**8524 patients identified as  
COVID-19 hospital admissions**

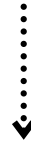

**7449 patients with COVID-19 confirmed by  
laboratory testing or diagnosed clinically or  
epidemiologically**

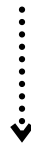

**6897 patients with no ICD-10  
diagnostic codes missing**

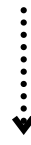

**6036 patients without  
duplicate admission records**

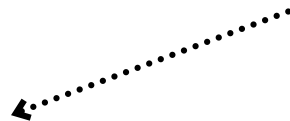

**4811 patients discharged from  
hospitals alive**

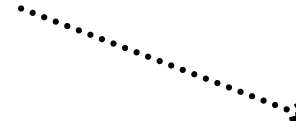

**1255 patients identified as  
COVID-19 related deaths**
